# Supplementary material for: Item distribution, internal consistency, and structural validity of the German version of the DEMQOL and DEMQOL–proxy
Source: Springer Nature journal article supplement (doi:10.1186/s12877-018-0930-0), 2018-10-19
Supplement: MOESM1 [file 16213010]

# Appendix

**Table A1:** Scale analysis and internal consistency of the *DEMQOL* (n = 183) and *DEMQOL-Proxy* (n = 179) using the data of T<sub>1</sub>, three months after the baseline assessment.

| <i>DEMQOL</i>                                                    |             |             |                |                |                 | <i>DEMQOL-Proxy</i>                                                        |             |             |                |                |                 |
|------------------------------------------------------------------|-------------|-------------|----------------|----------------|-----------------|----------------------------------------------------------------------------|-------------|-------------|----------------|----------------|-----------------|
|                                                                  | $\rho$      | $\alpha$    | H <sup>S</sup> | H <sub>i</sub> | r <sub>it</sub> |                                                                            | $\rho$      | $\alpha$    | H <sup>S</sup> | H <sub>i</sub> | r <sub>it</sub> |
| <b>A. Positive emotions</b>                                      | <b>0.73</b> | <b>0.73</b> | <b>0.40</b>    | H <sub>i</sub> | r <sub>it</sub> | <b>A. Positive emotions</b>                                                | <b>0.89</b> | <b>0.88</b> | <b>0.70</b>    | H <sub>i</sub> | r <sub>it</sub> |
| 10. ...lively?                                                   |             |             |                | 0.42           | 0.51            | 8. ...lively?                                                              |             |             |                | 0.77           | 0.82            |
| 6. ...full of energy?                                            |             |             |                | 0.34           | 0.42            | 4. ...full of energy?                                                      |             |             |                | 0.68           | 0.70            |
| 1. ...cheerful?                                                  |             |             |                | 0.40           | 0.51            | 11. ...that he/she has things to look forward to?                          |             |             |                | 0.65           | 0.66            |
| 3. ...that you are enjoying life?                                |             |             |                | 0.40           | 0.50            | 1. ...cheerful?                                                            |             |             |                | 0.73           | 0.76            |
| 5. ...confident?                                                 |             |             |                | 0.41           | 0.53            | 6. ...content?                                                             |             |             |                | 0.66           | 0.65            |
| <b>B. Negative emotions</b>                                      | <b>0.83</b> | <b>0.82</b> | <b>0.49</b>    | H <sub>i</sub> | r <sub>it</sub> | <b>B. Negative emotions</b>                                                | <b>0.87</b> | <b>0.87</b> | <b>0.58</b>    | H <sub>i</sub> | r <sub>it</sub> |
| 7. ...sad?                                                       |             |             |                | 0.53           | 0.65            | 7. ...distressed?                                                          |             |             |                | 0.61           | 0.72            |
| 9. ...distressed?                                                |             |             |                | 0.51           | 0.61            | 5. ...sad?                                                                 |             |             |                | 0.62           | 0.71            |
| 8. ...lonely?                                                    |             |             |                | 0.43           | 0.51            | 3. ...frustrated?                                                          |             |             |                | 0.62           | 0.72            |
| 4. ...frustrated?                                                |             |             |                | 0.52           | 0.63            | 2. ...worried or anxious?                                                  |             |             |                | 0.56           | 0.65            |
| 12. ...fed-up?                                                   |             |             |                | 0.45           | 0.53            | 10. ...fed-up?                                                             |             |             |                | 0.61           | 0.68            |
| 2. ...worried or anxious?                                        |             |             |                | 0.48           | 0.59            | 9. ...irritable?                                                           |             |             |                | 0.50           | 0.56            |
| <b>C. Physical and cognitive functioning</b>                     | <b>0.85</b> | <b>0.85</b> | <b>0.47</b>    | H <sub>i</sub> | r <sub>it</sub> | <b>C. Physical and cognitive functioning</b>                               | <b>0.90</b> | <b>0.89</b> | <b>0.55</b>    | H <sub>i</sub> | r <sub>it</sub> |
| 19. ...poor concentration?                                       |             |             |                | 0.51           | 0.64            | 12. ...his/her memory in general?                                          |             |             |                | 0.55           | 0.65            |
| 17. ...your thoughts being muddled?                              |             |             |                | 0.52           | 0.66            | 14. ...forgetting things that happened recently?                           |             |             |                | 0.59           | 0.69            |
| 14. ...forgetting things that happened recently?                 |             |             |                | 0.46           | 0.57            | 15. ...forgetting people's names?                                          |             |             |                | 0.53           | 0.63            |
| 27. ...how you feel in yourself?                                 |             |             |                | 0.50           | 0.61            | 18. ...his/her thoughts being muddled?                                     |             |             |                | 0.60           | 0.75            |
| 18. ...difficulty making decisions?                              |             |             |                | 0.51           | 0.66            | 19. ...difficulty making decisions?                                        |             |             |                | 0.61           | 0.76            |
| 28. ...your health overall?                                      |             |             |                | 0.40           | 0.49            | 17. ...forgetting what day it is?                                          |             |             |                | 0.53           | 0.66            |
| 16. ...forgetting what day it is?                                |             |             |                | 0.45           | 0.58            | 16. ...forgetting where he/she is?                                         |             |             |                | 0.51           | 0.58            |
| 13. ...that there are things that you wanted to do but couldn't? |             |             |                | 0.44           | 0.56            | 20. ...making him/herself understood?                                      |             |             |                | 0.48           | 0.55            |
|                                                                  |             |             |                |                |                 | 13. ...forgetting things that happened a long time ago?                    |             |             |                | 0.50           | 0.59            |
| <b>D. Daily activities and social relationships</b>              | <b>0.84</b> | <b>0.83</b> | <b>0.47</b>    | H <sub>i</sub> | r <sub>it</sub> | <b>D. Daily activities and social relationships</b>                        | <b>0.89</b> | <b>0.88</b> | <b>0.48</b>    | H <sub>i</sub> | r <sub>it</sub> |
| 21. ...how you get on with people close to you? <sup>a</sup>     |             |             |                | 0.50           | 0.66            | 23. ...getting what he/she wants from the shops? <sup>a</sup>              |             |             |                | 0.49           | 0.64            |
| 24. ...making yourself understood?                               |             |             |                | 0.49           | 0.60            | 24. ...using money to pay for things? <sup>a</sup>                         |             |             |                | 0.47           | 0.61            |
| 23. ...people not listening to you?                              |             |             |                | 0.54           | 0.68            | 21. ...keeping him-/herself clean (e.g. washing and bathing)? <sup>a</sup> |             |             |                | 0.57           | 0.68            |
| 22. ...getting the affection that you want? <sup>a</sup>         |             |             |                | 0.51           | 0.67            | 27. ...getting in touch with people?                                       |             |             |                | 0.47           | 0.60            |
| 25. ...getting help when you need it? <sup>a</sup>               |             |             |                | 0.45           | 0.55            | 22. ...keeping him-/herself looking nice? <sup>a</sup>                     |             |             |                | 0.53           | 0.66            |
| 20. ...not having enough company? <sup>a</sup>                   |             |             |                | 0.43           | 0.56            | 30. ...not playing a useful part in things?                                |             |             |                | 0.46           | 0.57            |
| 26. ...getting to the toilet in time? <sup>a</sup>               |             |             |                | 0.32           | 0.36            | 29. ...not being able to help other people? <sup>a</sup>                   |             |             |                | 0.52           | 0.68            |
|                                                                  |             |             |                |                |                 | 26. ...things taking longer than they used to?                             |             |             |                | 0.45           | 0.55            |
|                                                                  |             |             |                |                |                 | 31. ...his/her physical health?                                            |             |             |                | 0.43           | 0.50            |
|                                                                  |             |             |                |                |                 | 28. ...not having enough company? <sup>a</sup>                             |             |             |                | 0.50           | 0.66            |
|                                                                  |             |             |                |                |                 | 25. ...looking after his/her finances?                                     |             |             |                | 0.43           | 0.54            |

The criterion (Crit) by Molenaar, Sijtsma, and Boer used to check the monotonicity assumption is for all items in every of the ten imputed datasets = 0.

$\rho$  = rho (Molenaar Sijtsma statistic);  $\alpha$  = Cronbach's alpha (> 0.7 and < 0.95 = good); r<sub>it</sub> = part-whole-corrected item-total correlation (> 0.50 = high, > 0.30 = moderate);

H<sup>S</sup> = Loevinger's H coefficient of scalability of the scale (> 0.50 = strong, > 0.40 = medium, > 0.30 = weak); H<sub>i</sub> = Loevinger's H coefficient for an item and the remaining items of the scale.

<sup>a</sup> Item with ceiling effect, the mean is in the last 20 percent of the scale (≥ 3.4).
