# Supplementary material for: Item distribution, internal consistency, and structural validity of the German version of the DEMQOL and DEMQOL–proxy
Source: Springer Nature journal article supplement (doi:10.1186/s12877-018-0930-0), 2018-10-19
Supplement: MOESM2 [file 16213010]

# Appendix

**Table A2:** Scale analysis and internal consistency of the DEMQOL (n = 166) and DEMQOL-Proxy (n = 163) using the data of T2, nine months after the baseline assessment.

| <i>DEMQOL</i>                                                    |             |             |             |       |          | <i>DEMQOL-Proxy</i>                                                        |             |             |             |       |          |
|------------------------------------------------------------------|-------------|-------------|-------------|-------|----------|----------------------------------------------------------------------------|-------------|-------------|-------------|-------|----------|
|                                                                  | $\rho$      | $\alpha$    | $H^S$       | $H_i$ | $r_{it}$ |                                                                            | $\rho$      | $\alpha$    | $H^S$       | $H_i$ | $r_{it}$ |
| <b>A. Positive emotions</b>                                      | <b>0.78</b> | <b>0.77</b> | <b>0.45</b> | $H_i$ | $r_{it}$ | <b>A. Positive emotions</b>                                                | <b>0.87</b> | <b>0.85</b> | <b>0.62</b> | $H_i$ | $r_{it}$ |
| 10. ...lively?                                                   |             |             |             | 0.51  | 0.62     | 8. ...lively?                                                              |             |             |             | 0.70  | 0.79     |
| 6. ...full of energy?                                            |             |             |             | 0.43  | 0.52     | 4. ...full of energy?                                                      |             |             |             | 0.61  | 0.67     |
| 1. ...cheerful?                                                  |             |             |             | 0.44  | 0.53     | 11. ...that he/she has things to look forward to?                          |             |             |             | 0.58  | 0.62     |
| 3. ...that you are enjoying life?                                |             |             |             | 0.43  | 0.50     | 1. ...cheerful?                                                            |             |             |             | 0.65  | 0.70     |
| 5. ...confident?                                                 |             |             |             | 0.45  | 0.56     | 6. ...content?                                                             |             |             |             | 0.54  | 0.56     |
| <b>B. Negative emotions</b>                                      | <b>0.81</b> | <b>0.80</b> | <b>0.45</b> | $H_i$ | $r_{it}$ | <b>B. Negative emotions</b>                                                | <b>0.85</b> | <b>0.85</b> | <b>0.53</b> | $H_i$ | $r_{it}$ |
| 7. ...sad?                                                       |             |             |             | 0.53  | 0.68     | 7. ...distressed?                                                          |             |             |             | 0.56  | 0.68     |
| 9. ...distressed?                                                |             |             |             | 0.45  | 0.55     | 5. ...sad?                                                                 |             |             |             | 0.54  | 0.64     |
| 8. ...lonely?                                                    |             |             |             | 0.35  | 0.41     | 3. ...frustrated?                                                          |             |             |             | 0.58  | 0.69     |
| 4. ...frustrated?                                                |             |             |             | 0.48  | 0.61     | 2. ...worried or anxious?                                                  |             |             |             | 0.53  | 0.62     |
| 12. ...fed-up?                                                   |             |             |             | 0.41  | 0.49     | 10. ...fed-up?                                                             |             |             |             | 0.57  | 0.69     |
| 2. ...worried or anxious?                                        |             |             |             | 0.48  | 0.60     | 9. ...irritable?                                                           |             |             |             | 0.42  | 0.49     |
| <b>C. Physical and cognitive functioning</b>                     | <b>0.87</b> | <b>0.86</b> | <b>0.49</b> | $H_i$ | $r_{it}$ | <b>C. Physical and cognitive functioning</b>                               | <b>0.91</b> | <b>0.90</b> | <b>0.51</b> | $H_i$ | $r_{it}$ |
| 19. ...poor concentration?                                       |             |             |             | 0.54  | 0.68     | 12. ...his/her memory in general?                                          |             |             |             | 0.60  | 0.70     |
| 17. ...your thoughts being muddled?                              |             |             |             | 0.57  | 0.72     | 14. ...forgetting things that happened recently?                           |             |             |             | 0.56  | 0.65     |
| 14. ...forgetting things that happened recently?                 |             |             |             | 0.52  | 0.63     | 15. ...forgetting people's names?                                          |             |             |             | 0.52  | 0.60     |
| 27. ...how you feel in yourself?                                 |             |             |             | 0.53  | 0.65     | 18. ...his/her thoughts being muddled?                                     |             |             |             | 0.57  | 0.70     |
| 18. ...difficulty making decisions?                              |             |             |             | 0.52  | 0.67     | 19. ...difficulty making decisions?                                        |             |             |             | 0.54  | 0.66     |
| 28. ...your health overall?                                      |             |             |             | 0.45  | 0.56     | 17. ...forgetting what day it is?                                          |             |             |             | 0.58  | 0.71     |
| 16. ...forgetting what day it is?                                |             |             |             | 0.38  | 0.47     | 16. ...forgetting where he/she is?                                         |             |             |             | 0.58  | 0.67     |
| 13. ...that there are things that you wanted to do but couldn't? |             |             |             | 0.44  | 0.54     | 20. ...making him/herself understood?                                      |             |             |             | 0.55  | 0.64     |
|                                                                  |             |             |             |       |          | 13. ...forgetting things that happened a long time ago?                    |             |             |             | 0.54  | 0.65     |
| <b>D. Daily activities and social relationships</b>              | <b>0.80</b> | <b>0.80</b> | <b>0.40</b> | $H_i$ | $r_{it}$ | <b>D. Daily activities and social relationships</b>                        | <b>0.91</b> | <b>0.90</b> | <b>0.51</b> | $H_i$ | $r_{it}$ |
| 21. ...how you get on with people close to you? <sup>a</sup>     |             |             |             | 0.43  | 0.60     | 23. ...getting what he/she wants from the shops? <sup>a</sup>              |             |             |             | 0.54  | 0.71     |
| 24. ...making yourself understood?                               |             |             |             | 0.41  | 0.53     | 24. ...using money to pay for things? <sup>a</sup>                         |             |             |             | 0.54  | 0.70     |
| 23. ...people not listening to you?                              |             |             |             | 0.46  | 0.65     | 21. ...keeping him-/herself clean (e.g. washing and bathing)? <sup>a</sup> |             |             |             | 0.56  | 0.69     |
| 22. ...getting the affection that you want? <sup>a</sup>         |             |             |             | 0.40  | 0.54     | 27. ...getting in touch with people?                                       |             |             |             | 0.54  | 0.70     |
| 25. ...getting help when you need it? <sup>a</sup>               |             |             |             | 0.48  | 0.68     | 22. ...keeping him-/herself looking nice? <sup>a</sup>                     |             |             |             | 0.56  | 0.70     |
| 20. ...not having enough company? <sup>a</sup>                   |             |             |             | 0.29  | 0.38     | 30. ...not playing a useful part in things?                                |             |             |             | 0.50  | 0.64     |
| 26. ...getting to the toilet in time? <sup>a</sup>               |             |             |             | 0.28  | 0.35     | 29. ...not being able to help other people? <sup>a</sup>                   |             |             |             | 0.51  | 0.66     |
|                                                                  |             |             |             |       |          | 26. ...things taking longer than they used to?                             |             |             |             | 0.47  | 0.57     |
|                                                                  |             |             |             |       |          | 31. ...his/her physical health?                                            |             |             |             | 0.43  | 0.48     |
|                                                                  |             |             |             |       |          | 28. ...not having enough company? <sup>a</sup>                             |             |             |             | 0.53  | 0.69     |
|                                                                  |             |             |             |       |          | 25. ...looking after his/her finances?                                     |             |             |             | 0.41  | 0.52     |

The criterion (Crit) by Molenaar, Sijtsma, and Boer used to check the monotonicity assumption is for all items in every of the ten imputed datasets = 0, only item 20 of *DEMQOL* has a crit value on average of 56.

$\rho$  = rho (Molenaar Sijtsma statistic);  $\alpha$  = Cronbach's alpha (> 0.7 and < 0.95 = good);  $r_{it}$  = part-whole-corrected item-total correlation (> 0.50 = high, > 0.30 = moderate);

$H^S$  = Loevinger's H coefficient of scalability of the scale (> 0.50 = strong, > 0.40 = medium, > 0.30 = weak);  $H_i$  = Loevinger's H coefficient for an item and the remaining items of the scale.

<sup>a</sup> Item with ceiling effect, the mean is in the last 20 percent of the scale ( $\geq 3.4$ ).
